# Supplementary material for: Nanoscale mapping of wavelength-selective photovoltaic responses in H- and J-aggregates of azo dye-based solar cell films
Source: Royal Society of Chemistry journal article supplement (doi:10.1039/d0ta07328h), 2020-11-25

## Electronic Supplementary Information

PAPER

### Nanoscale Mapping of Wavelength–Selective Photovoltaic Responses in H– and J–Aggregates of Azo Dye–based Solar Cell Films

Received 27th July 2020,  
Accepted 00th January 20xx

DOI: 10.1039/x0xx00000x

Shashank Shekhar,<sup>a</sup> Inkyoung Park,<sup>a</sup> Jeongsu Kim,<sup>a</sup> Myungjae Yang,<sup>a</sup> Duckhyung Cho<sup>a</sup> and Seunghun Hong<sup>\*a</sup>

<sup>a</sup> Department of Physics and Astronomy, and Institute of Applied Physics, Seoul National University, Seoul, 08826, Korea. E-mail: seunghun@snu.ac.kr

† Footnotes relating to the title and/or authors should appear here.

Electronic Supplementary Information (ESI) available: [Current and noise maps of dye solar cell films]. See DOI: 10.1039/x0xx00000x

## Change in trap density dependence on initial trap density

### Current Map

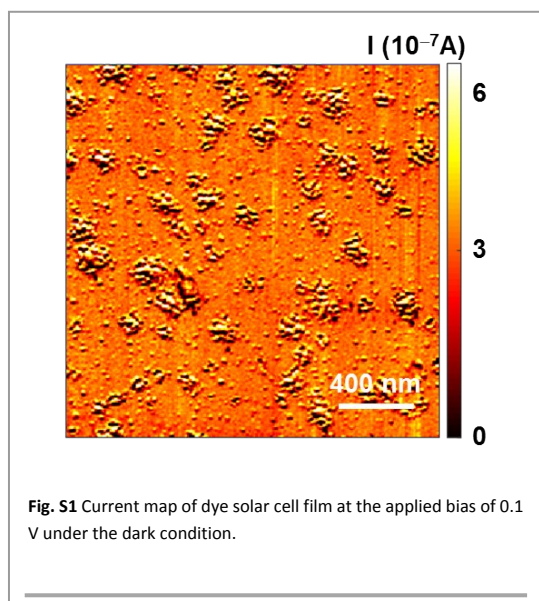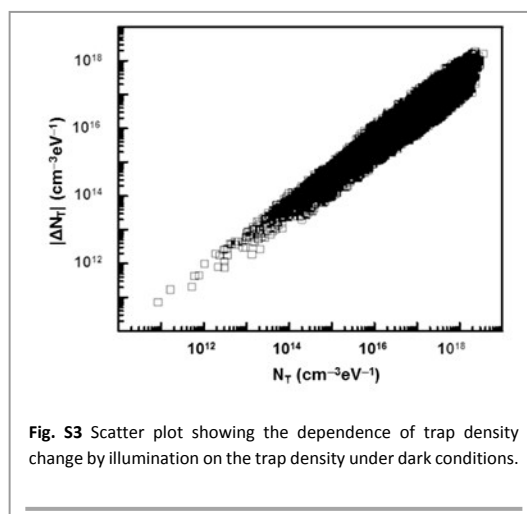

### Noise Map

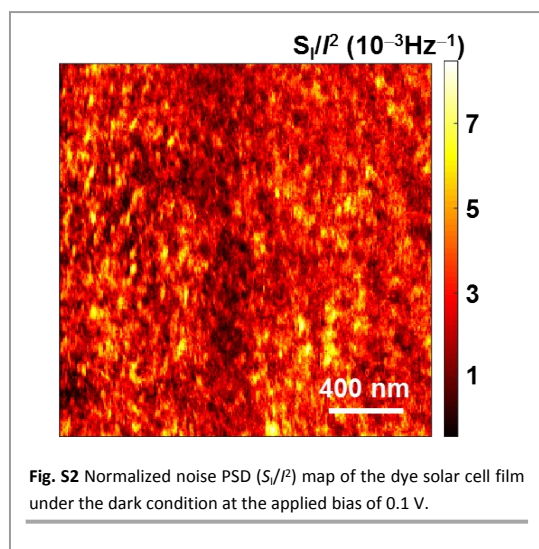

Supplement: d0ta07328h1.pdf [file d0ta07328h1.pdf]
